# Supplementary material for: Using Student Writing and Lexical Analysis to Reveal Student Thinking about the Role of Stop Codons in the Central Dogma
Source: Atypon-hosted journal article supplement (doi:10.1187/cbe.15-12-0267), 2016-12-01
Supplement: combinedsupmats.pdf [file combinedsupmats.pdf]

# Supplemental Material

*CBE—Life Sciences Education*

Prevost *et al.*

## Supplemental Materials

Table S1. Odds-ratios and confidence intervals for multinomial logistic regression for the transcription question<sup>a</sup>.

| Text Analysis<br>Category             | Incomplete/Irrelevant (Bin 2) |                 |                 |     | Incorrect (Bin 3) |       |                 |     |
|---------------------------------------|-------------------------------|-----------------|-----------------|-----|-------------------|-------|-----------------|-----|
|                                       | $\beta^b$                     | OR <sup>c</sup> | CI <sup>d</sup> | Sig | $\beta$           | OR    | CI              | Sig |
| <i>mutation</i>                       | 0.44                          | 1.55            | (0.71 – 3.37)   | NS  | -1.54             | 0.22  | (0.08 – 0.58)   | NS  |
| <i>gene</i>                           | 1.88                          | 6.56            | (1.79 – 24.06)  | ↑   | 1.71              | 5.54  | (1.38 – 22.25)  | ↑   |
| <i>normal</i>                         | -2.09                         | 0.12            | (0.03 – 0.46)   | ↓   | -2.26             | 0.10  | (0.03 – 0.37)   | ↓   |
| <i>protein</i>                        | 1.43                          | 4.18            | (1.32 – 13.18)  | ↑   | 0.87              | 2.38  | (0.67 – 8.44)   | NS  |
| <i>short</i>                          | 0.36                          | 1.43            | (0.21 – 9.73)   | NS  | 4.03              | 56.36 | (14.78 – 214.9) | ↑   |
| <i>stop</i>                           | 0.32                          | 1.38            | (0.35 – 5.36)   | NS  | 3.72              | 41.40 | (15.60 – 109.9) | ↑   |
| <i>stop codon</i>                     | 0.15                          | 1.16            | (0.52 – 2.56)   | NS  | 1.33              | 3.76  | (1.95 – 7.27)   | ↑   |
| <i>strand</i>                         | -0.75                         | 0.47            | (0.18 – 1.26)   | NS  | 0.61              | 1.83  | (0.84 – 4.02)   | NS  |
| <i>translation</i>                    | -1.76                         | 0.17            | (0.03 – 0.87)   | ↓   | -2.09             | 0.12  | (0.03 – 0.50)   | ↓   |
| <i>triplet</i>                        | -1.53                         | 0.22            | (0.08 – 0.58)   | ↓   | -2.09             | 0.12  | (0.04 – 0.36)   | ↓   |
| <i>wrong</i>                          | 0.75                          | 2.13            | (0.90 – 5.02)   | NS  | -3.08             | 0.05  | (0.01 – 0.27)   | ↓   |
| <i>DNA</i>                            | 0.11                          | 1.12            | (0.61 – 2.06)   | NS  | 0.94              | 2.57  | (1.44 – 4.57)   | ↑   |
| <i>different</i>                      | 0.225                         | 1.25            | (0.60 – 2.61)   | NS  | -1.84             | 0.16  | (0.05 – 0.47)   | ↓   |
| <i>no effect on<br/>transcription</i> | -2.53                         | 0.08            | (0.03 – 0.21)   | ↓   | -2.64             | 0.07  | (0.03 – 0.17)   | ↓   |
| <i>incomplete</i>                     | 3.06                          | 21.32           | (1.43 – 316.98) | ↑   | 4.17              | 64.76 | (5.52 – 759.82) | ↑   |
| <i>transcription</i>                  | -0.59                         | 0.55            | (0.33 – 0.94)   | ↓   | -0.58             | 0.56  | (0.33 – 0.96)   | ↓   |

<sup>a</sup> reference value of the dependent variable score =correct; <sup>b</sup> regression coefficient; <sup>c</sup>OR odds ratio; <sup>d</sup> CI

– 95% confidence interval; <sup>e</sup> ↑significant increase compared to reference value p<0.05; ↓significant

decrease compared to reference value p<0.05; NS – no significant change in odds ratio compared to

reference value p>0.05

Table S2. Odds-ratios and confidence intervals for multinomial logistic regression for the translation question<sup>a</sup>.

| Text Analysis<br>Category | Incomplete/Irrelevant (Bin 2) |                 |                 |     | Incorrect (Bin 3) |       |                |     |
|---------------------------|-------------------------------|-----------------|-----------------|-----|-------------------|-------|----------------|-----|
|                           | $\beta^b$                     | OR <sup>c</sup> | CI <sup>d</sup> | Sig | $\beta$           | OR    | CI             | Sig |
| <i>DNA</i>                | 0.20                          | 1.22            | (0.64 – 2.32)   | NS  | 0,69              | 1.99  | (1.13 – 3.51)  | ↑   |
| <i>mRNA</i>               | 1.28                          | 3.59            | (1.70 – 7.58)   | ↑   | 1.49              | 4.43  | (2.31 – 8.50)  | ↑   |
| <i>protein</i>            | 0.14                          | 1.15            | (0.68 – 1.93)   | NS  | -1.06             | 0.35  | (0.21 – 0.58)  | ↓   |
| <i>replicate</i>          | 2.77                          | 16.00           | (2.96 – 86.54)  | ↑   | 3.05              | 21.19 | (4.95 – 90.64) | ↑   |
| <i>short</i>              | -5.53                         | 0.01            | (0.00 – 0.30)   | ↓   | -1.55             | 0.21  | (0.12 – 0.39)  | ↓   |
| <i>stop</i>               | -3.02                         | 0.05            | (0.03 – 0.09)   | ↓   | -2.67             | 0.07  | (0.04 – 0.13)  | ↓   |
| <i>stop codon</i>         | -1.72                         | 0.18            | (0.10 – 0.32)   | ↓   | -1.89             | 0.16  | (0.09 – 0.27)  | ↓   |
| <i>transcribe</i>         | -0.53                         | 0.59            | (0.15 – 2.35)   | NS  | 1.39              | 4.00  | (1.49 – 10.75) | ↑   |
| <i>different</i>          | 1.42                          | 4.14            | (1.92 – 8.94)   | ↑   | 0.70              | 2.02  | (0.91 – 4.47)  | NS  |
| <i>transcription</i>      | 0.93                          | 2.53            | (0.74 – 8.60)   | NS  | 2.11              | 8.23  | (3.09 – 21.92) | ↓   |

<sup>a</sup> reference value of the dependent variable score =correct; <sup>b</sup> regression coefficient; <sup>c</sup>OR odds ratio; <sup>d</sup> CI

– 95% confidence interval; <sup>e</sup>↑significant increase compared to reference value  $p < 0.05$ ; ↓significant

decrease compared to reference value  $p < 0.05$ ; NS – no significant change in odds ratio compared to

reference value  $p > 0.05$
